# Supplementary material
Source: PubMed Central journal article supplement (PMC8314015)

**Supplemental Figure 1.** Phosphorylated-retinoblastoma protein (p-Rb) and retinoblastoma protein (Rb) expression after incubation with palbociclib among the panel of head and neck squamous cell carcinoma (HNSCC) lines. Representative western blot showing protein expression for p-Rb, Rb, and  $\beta$ -actin (**A**). (+) and (-) designates treatment condition with or without 1  $\mu$ M palbociclib. Raw western blots, with protein bands labeled accordingly, are shown below (**B**).

**Part A:**

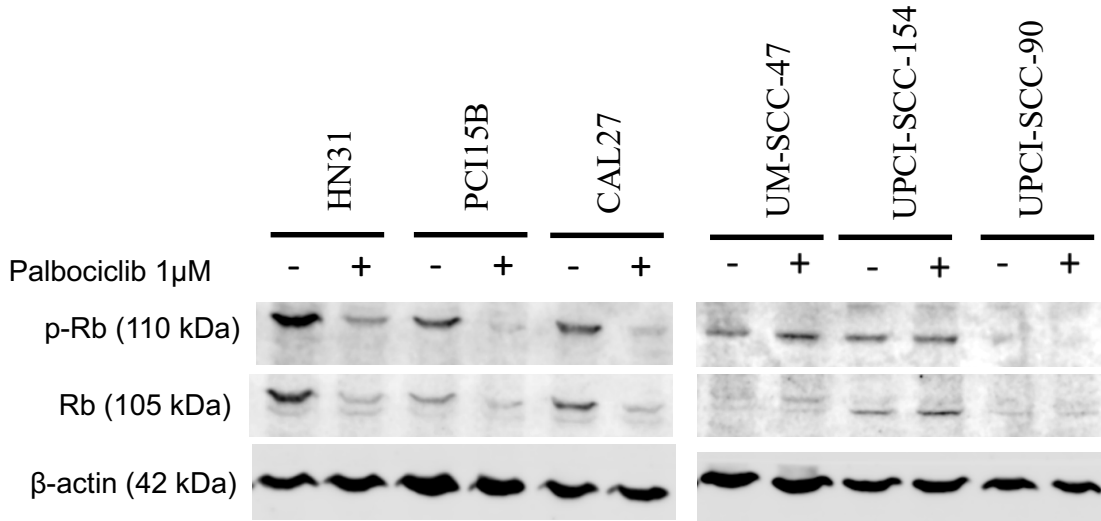

**Part B:**

18\_02\_12: HPV- lines, p-Rb

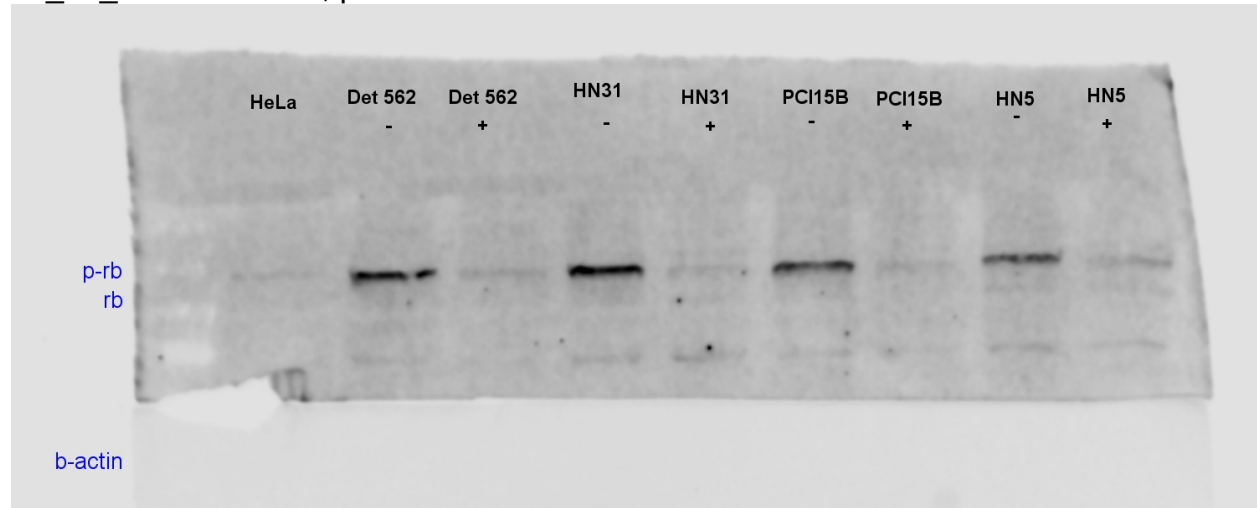

18\_02\_12: HPV- lines, p-Rb, Rb,  $\beta$ -actin

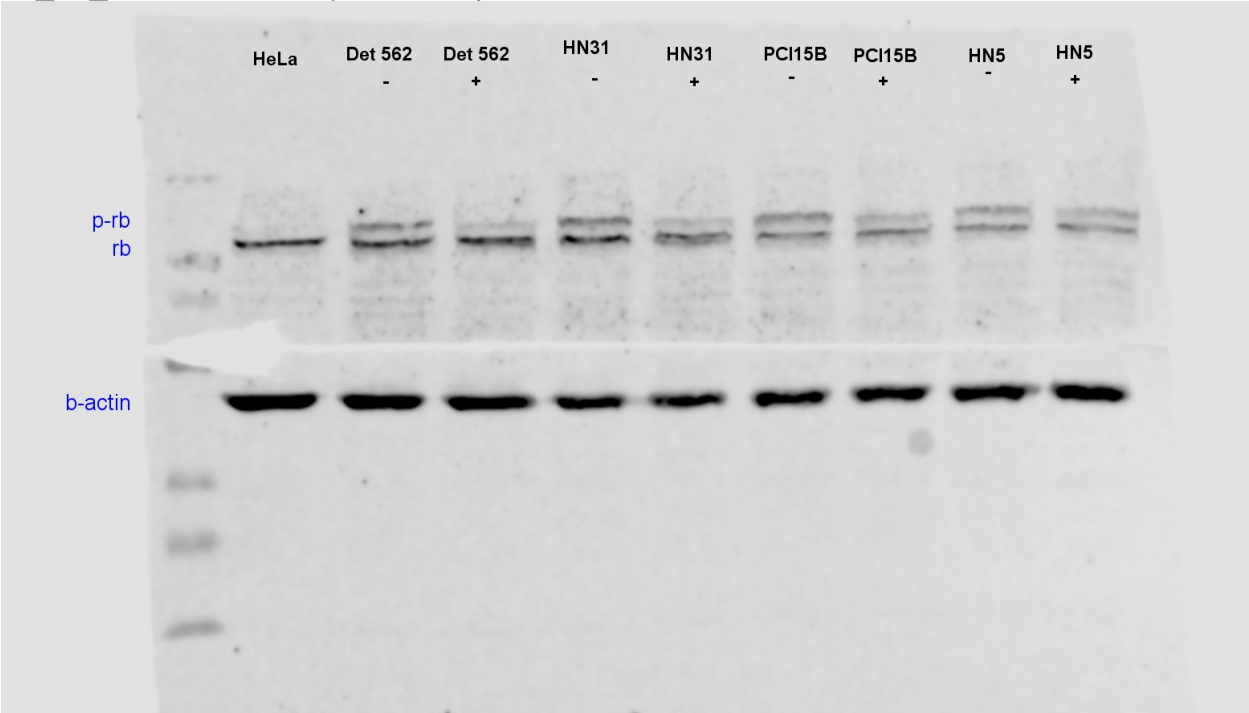

18\_02\_12: HPV+ lines, p-Rb, Rb,  $\beta$ -actin

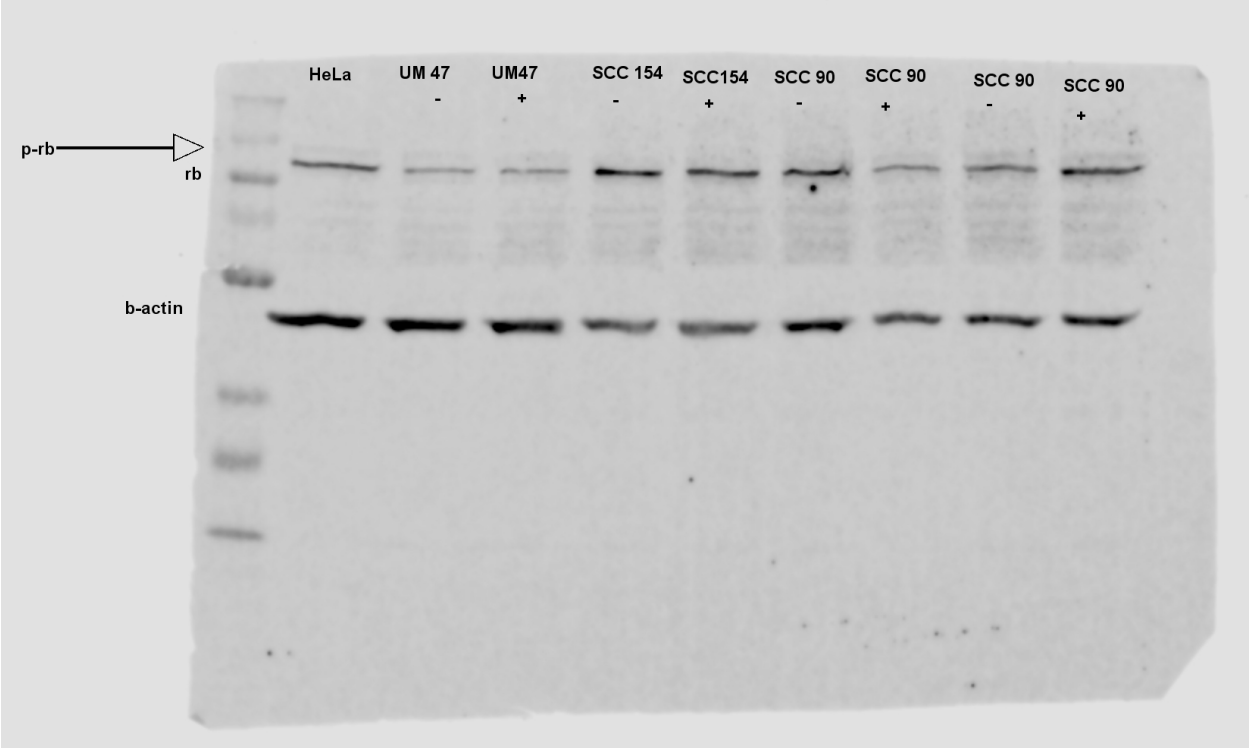

20\_06\_11: all lines, p-Rb

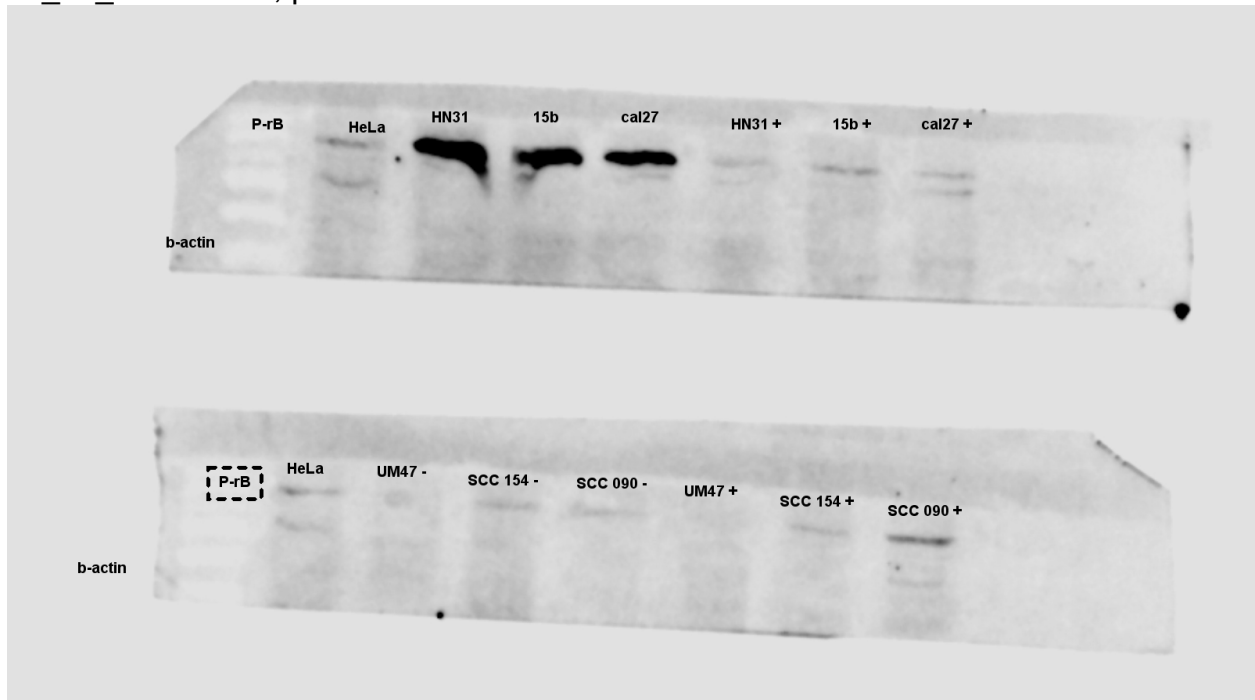

20\_06\_24: all lines, p-Rb

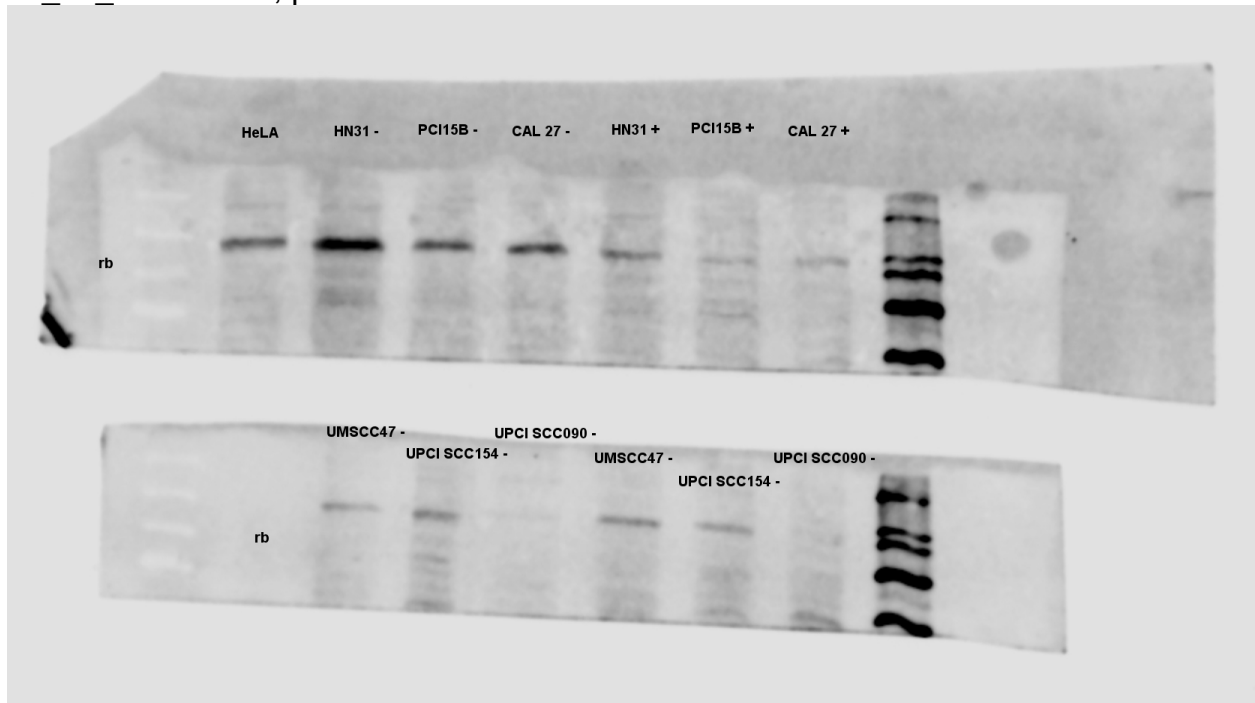

20\_06\_30: HPV+ lines, p-Rb

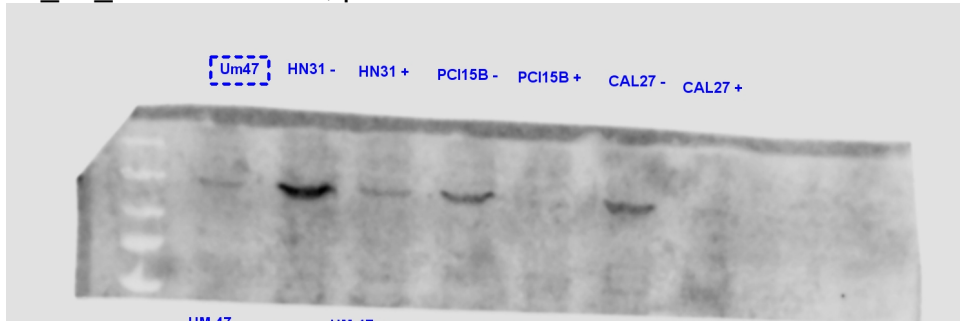

20\_06\_30: HPV+ lines, pRb and  $\beta$ -actin

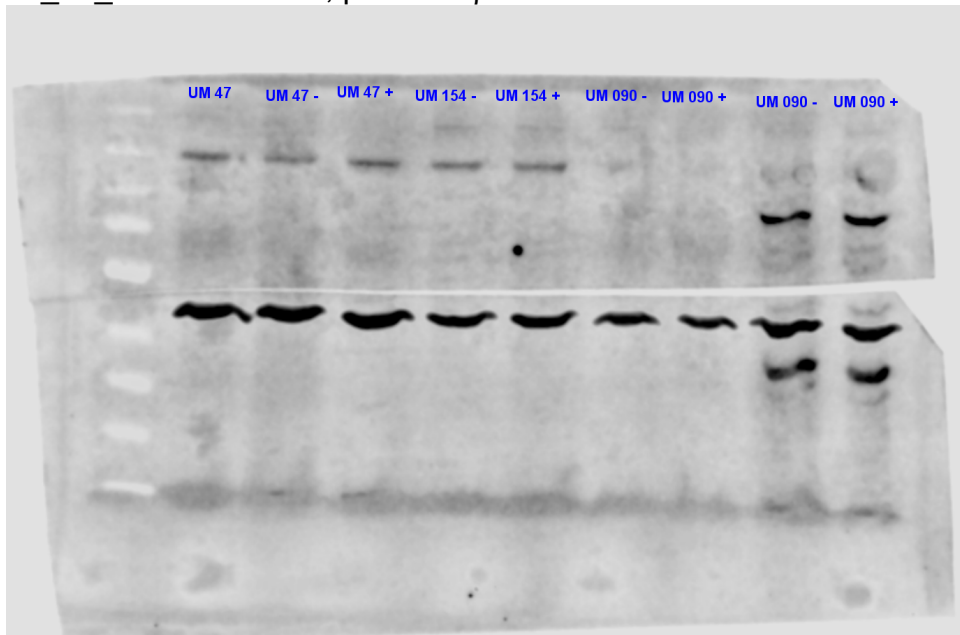

**Supplemental Figure 2.**  $\beta$ -galactosidase, BCL-xL, BCL-2, and BCL-w protein expression after incubation with palbociclib among the panel of head and neck squamous cell carcinoma (HNSCC) lines. Raw western blots, with protein bands labeled accordingly, that were used in quantification process for Figure 3 are shown below. Blots organized by protein that was probed against:  $\beta$ -galactosidase (**A**), BCL-xL (**B**), BCL-2 (**C**), and BCL-w (**D**).

**Part A:  $\beta$ -galactosidase**

19\_02\_19: HN31 + PCI15B

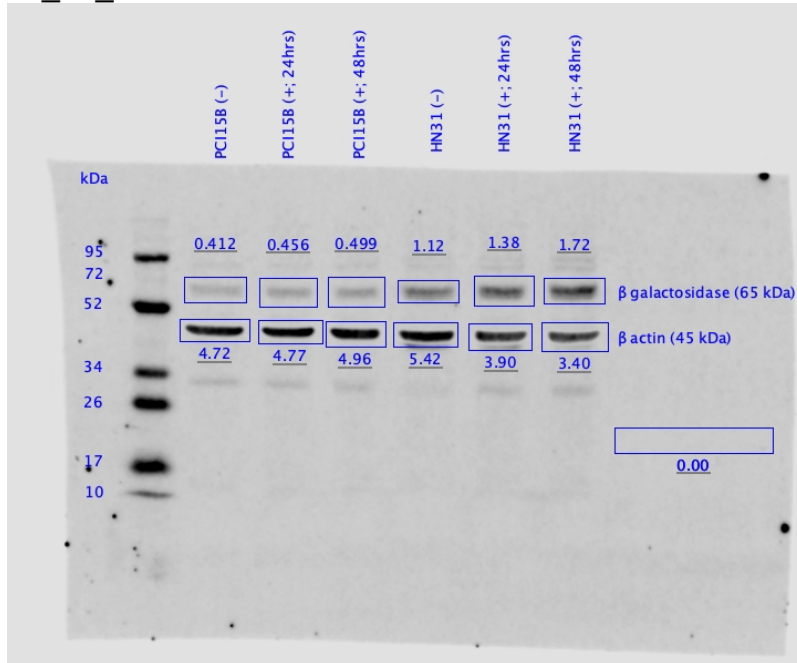

19\_02\_21: CAL27, HN31, PCI15B

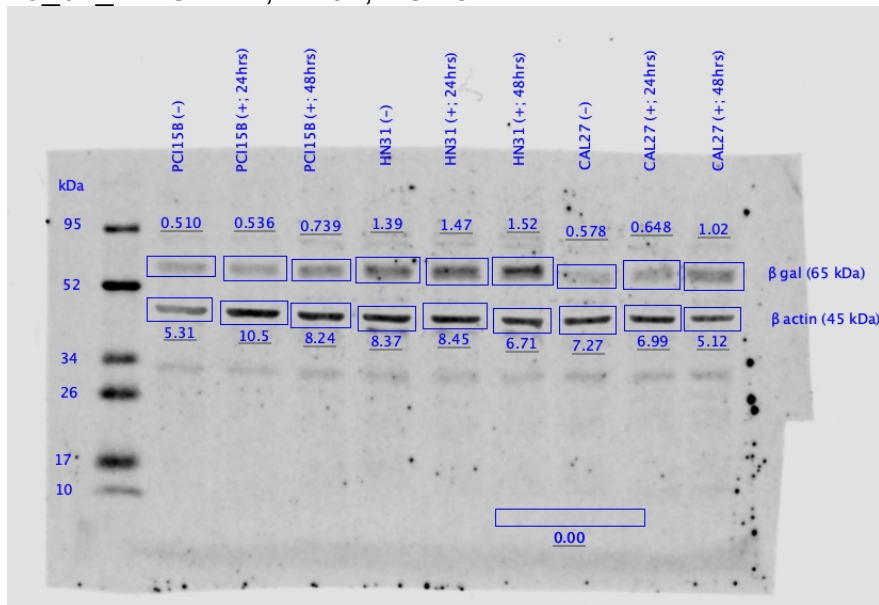

19\_02\_25: CAL27, HN31, PCI15B

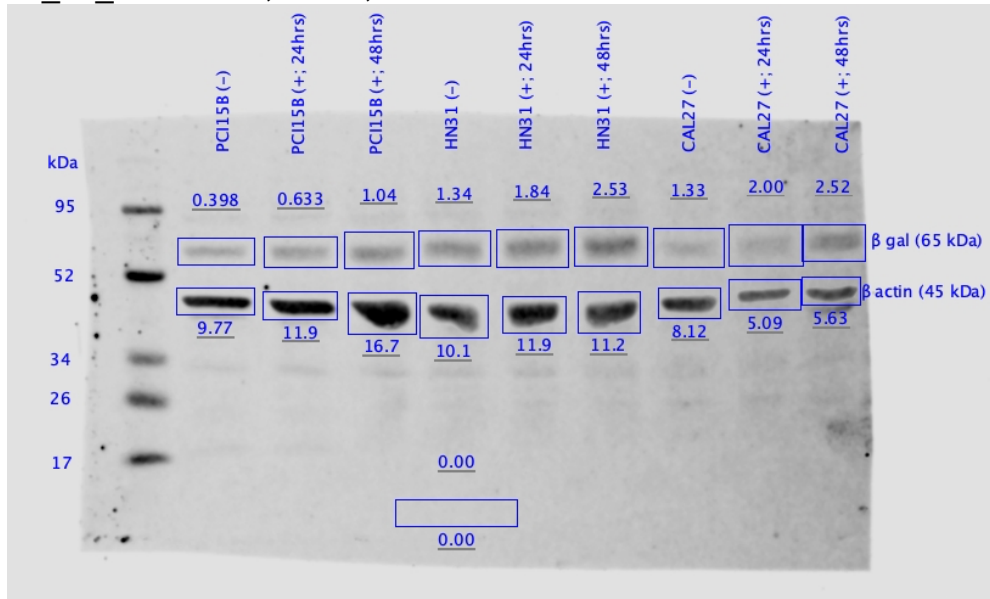

19\_03\_08: CAL27, HN31, PCI15B

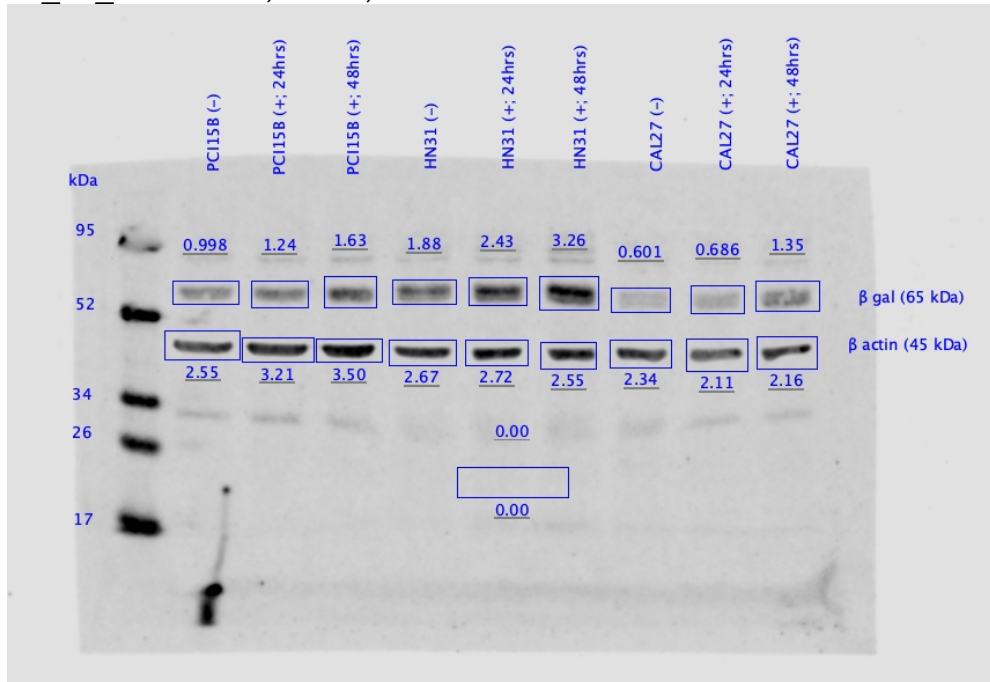

## Part B: BCL-xL

19\_02\_19: HN31 + PCI15B

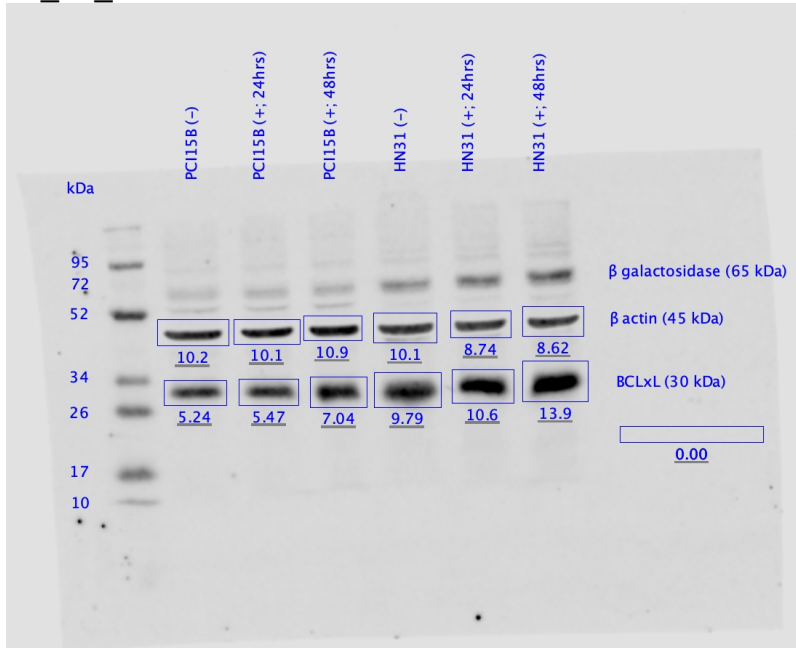

19\_02\_21: CAL27, HN31, PCI15B

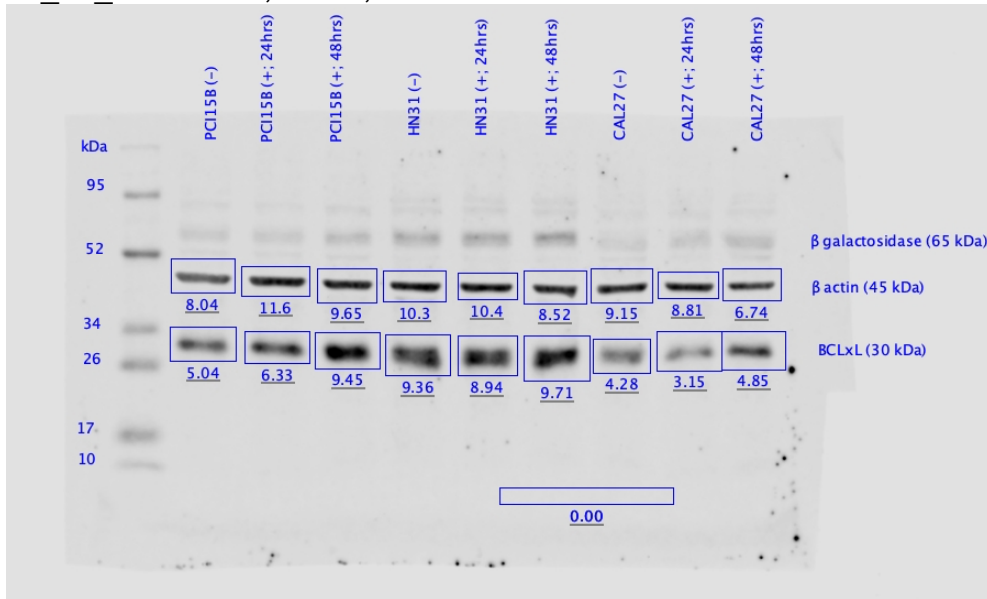

19\_02\_25: CAL27, HN31, PCI15B

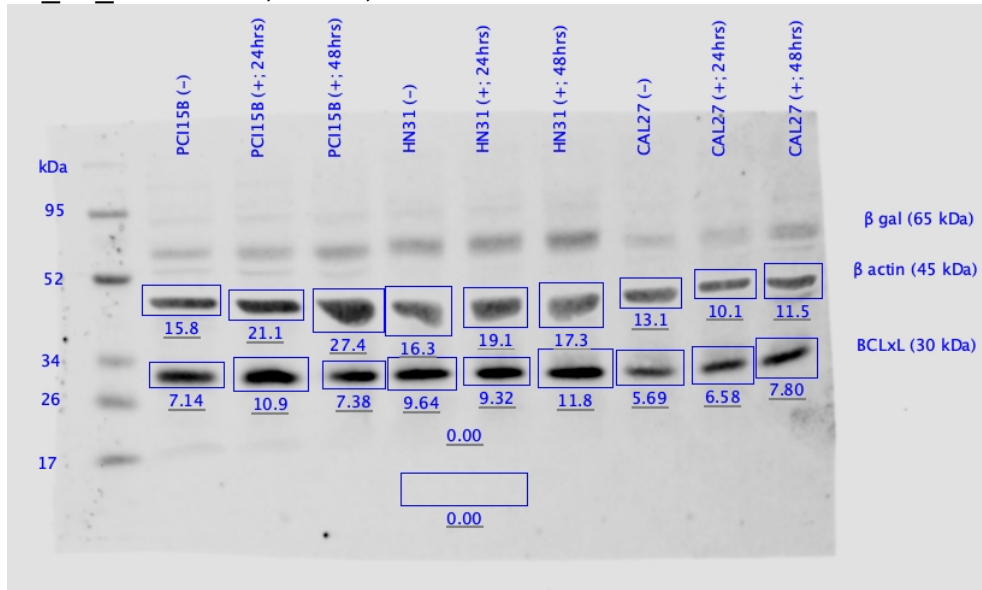

19\_03\_08: CAL27, HN31, PCI15B

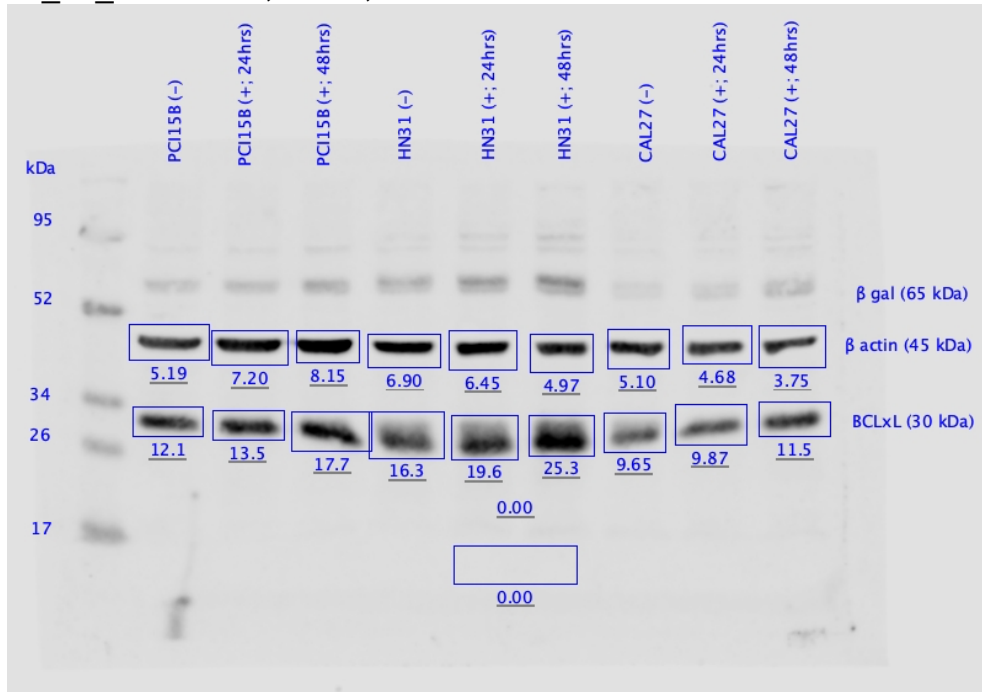



### Part C: BCL-2

19\_02\_21: CAL27, HN31, PCI15B

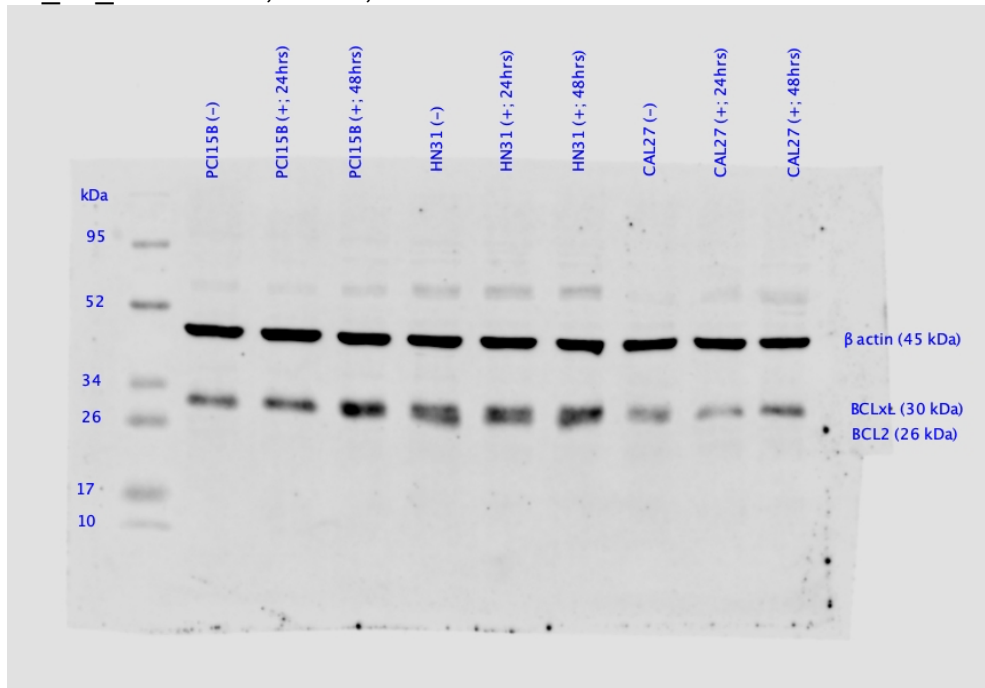

19\_02\_25: CAL27, HN31, PCI15B

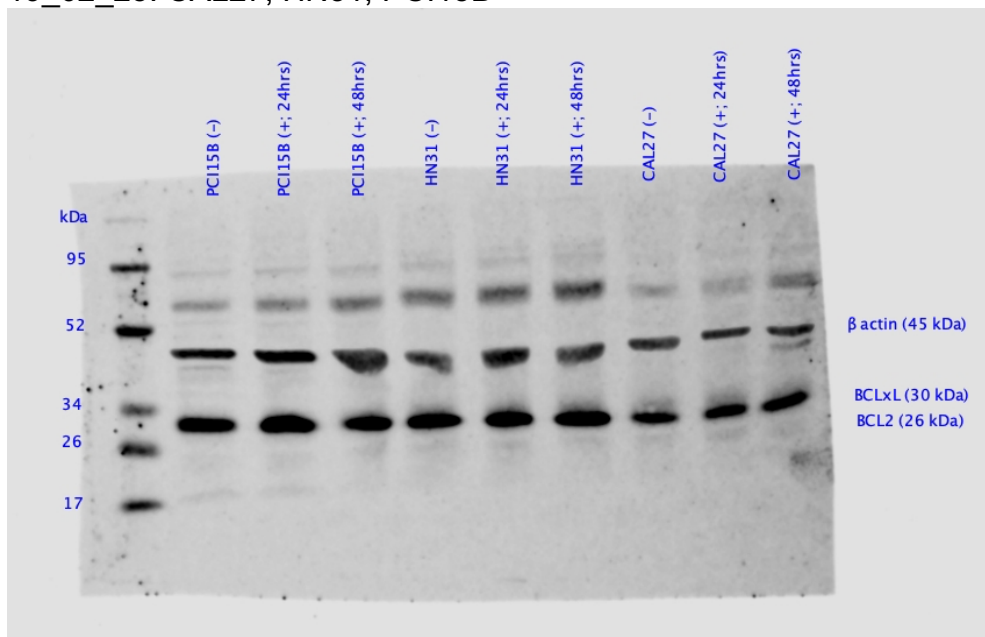

19\_03\_01: CAL27, HN31, PCI15B

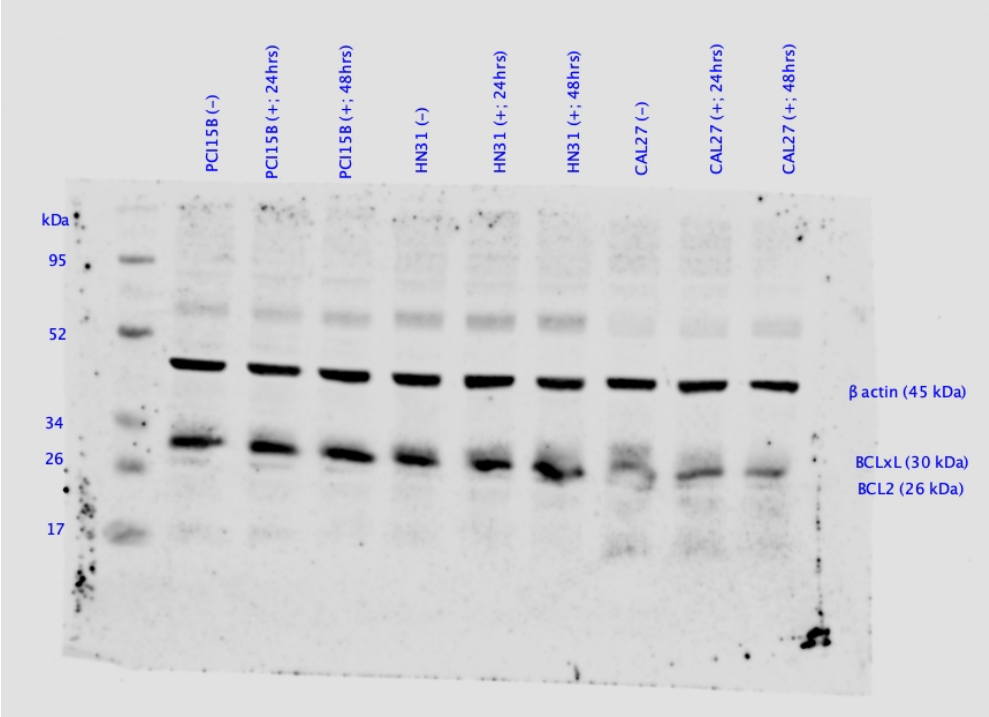

### Part D: BCL-w

19\_02\_21: CAL27, HN31, PCI15B

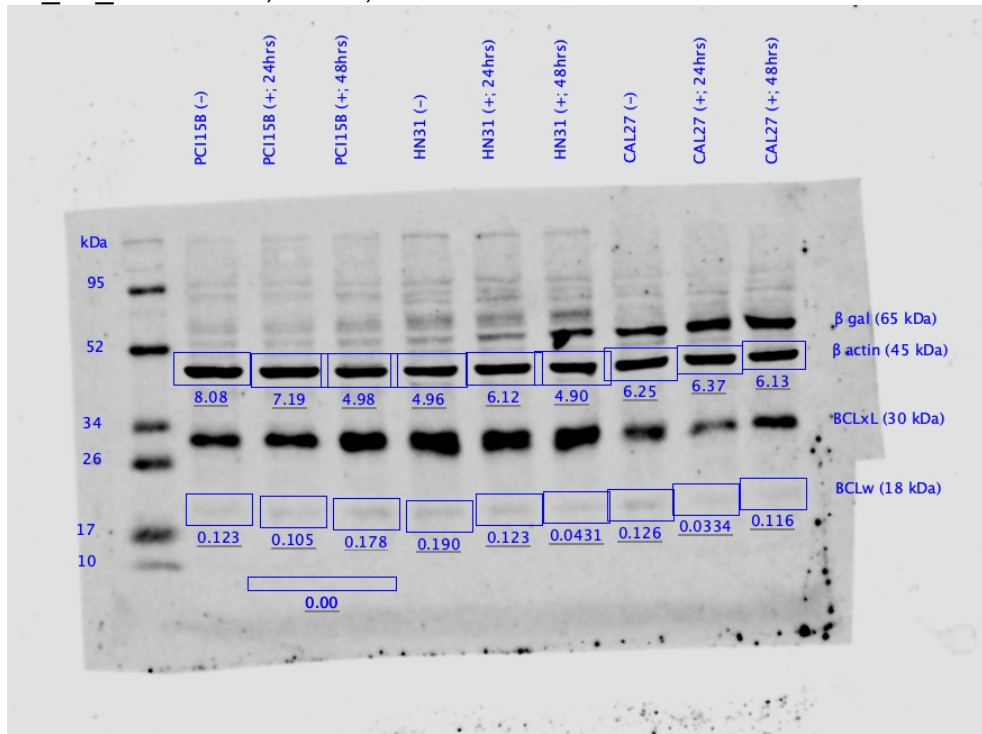

19\_02\_25: CAL27, HN31, PCI15B

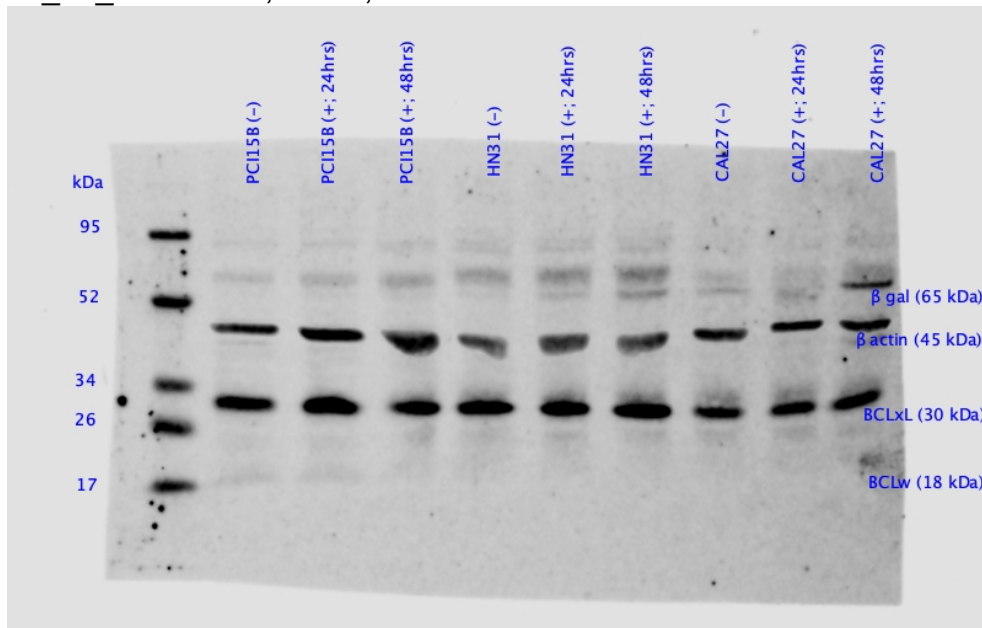

19\_03\_01: CAL27, HN31, PCI15B

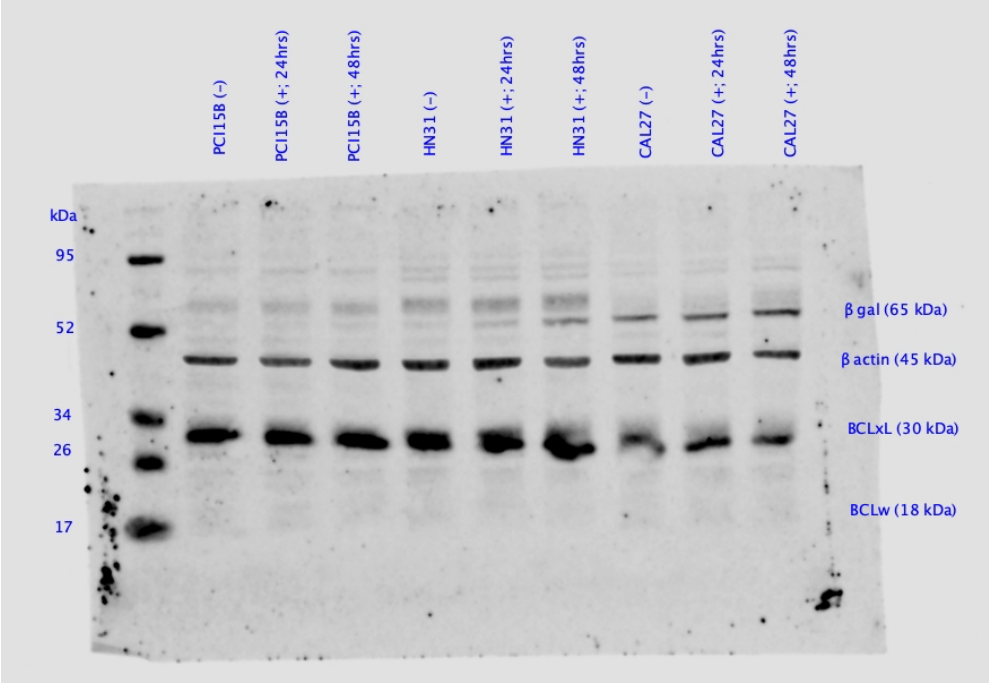

Supplement: NIHMS1716215-supplement-supplemental_data.pdf [file NIHMS1716215-supplement-supplemental_data.pdf]
